# Supplementary material for: Understanding the Significance and Implications of Antibody Numbering and Antigen-Binding Surface/Residue Definition
Source: Front Immunol. 2018 Oct 16;9:2278. doi: 10.3389/fimmu.2018.02278 (PMC6198058; doi:10.3389/fimmu.2018.02278)
Supplement: Table S1 — Alignment of the numbering systems described by Kabat, Chothia, Martin (enhenced Chothia), Gelfand, IMGT and Honegger. VL states for variable domains of light chains, VH for variable domains of heavy chains. IMGT and Honegger (Aho) numbering systems do not take into account the nature (heavy or light) of the chain. Insertion positions are highlighted in yellow. In the Aho numbering scheme, these yellow residues correspond to the gap positions. Deletion positions are in brackets (residue L 10 in lambda light chains, Martin numbering scheme). CDR definitions are indicated in orange and framework definitions in blue (IMGT and Aho schemes). The Gelfand numbering scheme is divided in words (boxes) with the numbering below. For the Aho numbering scheme, structurally conserved position are highlighted in green. Conserved amino acids are indicated below the IMGT numbering scheme (Cys 23, Trp 41, Leu 89, Cys 104, Phe/Trp 118, Gly 119). [file Table_1.XLSX]

## Sheet: Table S1
VL Kabat	1	2	3	4	5	6	7	8					9	(10)	11	12	13	14	15	16	17	18	19	20	21	22	23	24	25	26	27	27a	27b	27c	27d	27e	27f			28	29	30	31	32	33	34	35	36	37
																												CDRL1 (Kabat)
VL Chothia	1	2	3	4	5	6	7	8					9	(10)	11	12	13	14	15	16	17	18	19	20	21	22	23	24	25	26	27	28	29	30	30a	30b	30c	30d	30e	30f			31	32	33	34	35	36	37
																														CDRL1 (Chothia)
VL Martin	1	2	3	4	5	6	7	8					9	(10)	11	12	13	14	15	16	17	18	19	20	21	22	23	24	25	26	27	28	29	(30)	30a	30b	30c	30d	30e	30f			31	32	33	34	35	36	37
VL Gelfand	OA			A			AA'								A'				A'B			B								BC			CB												C
	1	2	3	1	2	3	1	2	3	4	5	6	7	8	1	2	3	4	1	2	3	1	2	3	4	5	6	7	8	1	2	3	1	2	3	4	5	6	7	8	9	10	11	12	1	2	3	4	5
IMGT	1	2	3	4	5	6	7	8					9	10	11	12	13	14	15	16	17	18	19	20	21	22	23	24	25	26	27	28	29	30	31	32	33			34	35	36	37	38	39	40	41	42	43
	FR1-IMGT																														CDR1-IMGT														FR2-IMGT
																											C																				W
Aho	1	2	3	4	5	6	7	8					9	10	11	12	13	14	15	16	17	18	19	20	21	22	23	24	25	26	27	28	29	30	31	32	33	34	35	36	37	38	39	40	41	42	43	44	45
	FRAMEWORK1																												CDR1																FRAMEWORK2
VH Kabat	1	2	3	4	5	6	7	8					9		10	11	12	13	14	15	16	17	18	19	20	21	22	23	24	25	26	27	28	29	30	31	32			33	34	35	35a	35b			36	37	38
																																				CDRH1 (Kabat)
VH Chothia	1	2	3	4	5	6	7	8					9		10	11	12	13	14	15	16	17	18	19	20	21	22	23	24	25	26	27	28	29	30	31	31a	31b					32	33	34	35	36	37	38
																															CDRH1 (Chothia)
VH Martin	1	2	3	4	5	6	7	8	8a	8b	8c	8d	(9)		10	11	12	13	14	15	16	17	18	19	20	21	22	23	24	25	26	27	28	29	30	(31)	31a	31b					32	33	34	35	36	37	38
VH Gelfand	OA			A			AA'								A'				A'B			B								BC				CB											C
	1	2	3	1	2	3	1	2	3	4	5	6	7	8	1	2	3	4	1	2	3	1	2	3	4	5	6	7	8	1	2	3	4	1	2	3	4	5	6	7	8	9	10	11	1	2	3	4	5
[truncated: 110 more columns]

## Sheet: Table S2
Light chain																									C																				W
	Numbering system
		IMGT	1	2	3	4	5	6	7	8	9	10	11	12	13	14	15	16	17	18	19	20	21	22	23	24	25	26	27	28	29	30	31	32	33			34	35	36	37	38	39	40(b)	41	42(b,c,d)	43	44(a,b,c)	45
		Aho	1	2	3	4	5	6	7	8	9	10	11	12	13	14	15	16	17	18	19	20	21	22	23	24	25	26	27	28	29	30	31	32	33	34	35	36	37	38	39	40	41	42(b)	43	44(b,c,d)	45	46(a,b,c)	47
		VL Kabat	1	2	3	4	5	6	7	8	9	(10)	11	12	13	14	15	16	17	18	19	20	21	22	23	24	25	26	27	27a	27b	27c	27d	27e	27f			28	29	30	31	32	33	34(b)	35	36(b,c,d)	37	38(a,b,c)	39
		VL Chothia	1	2	3	4	5	6	7	8	9	(10)	11	12	13	14	15	16	17	18	19	20	21	22	23	24	25	26	27	28	29	30	30a	30b	30c	30d	30e	30f			31	32	33	34(b)	35	36(b,c,d)	37	38(a,b,c)	39
	CDR definition
		Kabat																								CDRL1 (Kabat)
		Chothia																										CDRL1 (Chothia)
		Contact (Martin)																														CDRL1 (Contact / Martin)
Heavy chain
		IMGT (common for VH and VL)																											CDR1-IMGT
		Aho (common for VH and VL)																									CDR1 (Aho)
		Kabat																																CDRH1 (Kabat)
		Chothia																											CDRH1 (Chothia)
		Contact (Martin)																															CDRH1 (Contact / Martin)
	Numbering system
		IMGT	1	2	3	4	5	6(e)	7	8	9(e)	10	11	12	13	14	15	16	17	18	19	20	21	22	23	24	25	26	27	28	29	30	31	32	33			34	35	36	37	38(a)	39	40(b)	41	42(c)	43	44(c)	45
		Aho	1	2	3	4	5	6(e)	7	8	9(e)	10	11	12	13	14	15	16	17	18	19	20	21	22	23	24	25	26	27	28	29	30	31	32	33	34	35	36	37	38	39	40(a)	41	42(b)	43	44(c)	45	46(c)	47
		VH Kabat	1	2	3	4	5	6(e)	7	8	9(e)		10	11	12	13	14	15	16	17	18	19	20	21	22	23	24	25	26	27	28	29	30	31	32			33	34	35	35a	35b(a)			36	37(c)	38	39(c)	40
		VH Chothia	1	2	3	4	5	6(e)	7	8	9(e)		10	11	12	13	14	15	16	17	18	19	20	21	22	23	24	25	26	27	28	29	30	31	31a	31b					32	33(a)	34	35(b)	36	37(c)	38	39(c)	40
Legend
	impact on VH/VL angulation
	(a) : Abhinandan & Martin, 2010
	(b) : Dunbar et al., 2013
	(d) : Chailyan et al., 2012
	impact on affinity
	(c) : Chatelier et al., 1996
	(e) :Honegger et al., 2001
	bold, surligned : 30 positions impacting the most the free binding energy (Robin et al., 2014)
[truncated: 102 more columns]
